# Supplementary material
Source: Royal Society of Chemistry journal article supplement (doi:10.1039/d6ta04114k)
Supplement: d6ta04114k1.pdf [file d6ta04114k1.pdf]

**Supporting Information for**  
***p-d* hybridized Single-atom Catalysts based on**  
**Covalent-bond-linked Fullerene Monolayer Network for CO<sub>2</sub>**  
**Reduction**

Manfu Li<sup>1</sup>, Zhilin Liu<sup>1</sup>, Guang Yang<sup>1</sup>, Xiaoyan Ren,<sup>1,\*</sup> and Shunfang Li<sup>1,2,†</sup>

<sup>1</sup>Key Laboratory of Material Physics, Ministry of Education, School of Physics,  
Zhengzhou University, Zhengzhou 450001, China

<sup>2</sup>Institute of Quantum Materials and Physics, Henan Academy of Sciences,  
Zhengzhou 450046, China

E-mails: renxyan@zzu.edu.cn; sflizzu@zzu.edu.cn

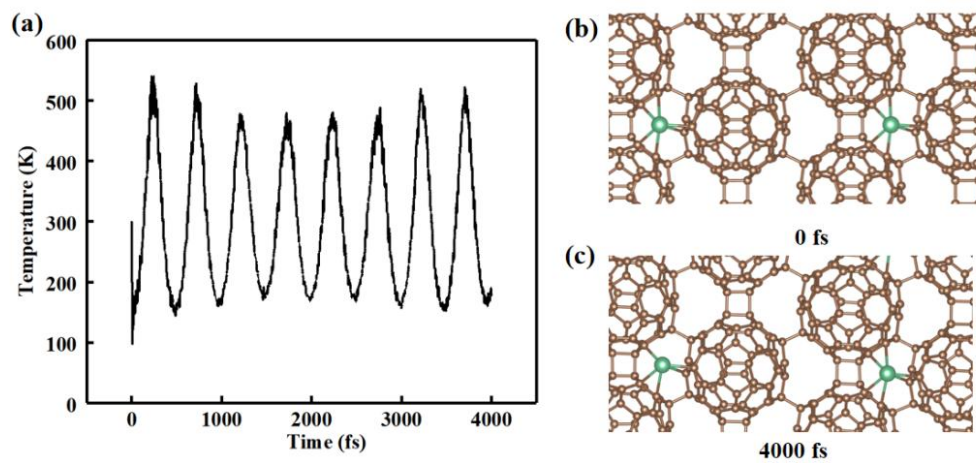

Fig. S1 Ab initio molecular dynamics (AIMD) simulations of the Nb<sub>1</sub>@qHP-C<sub>60</sub> system at 300 K over 4 ps.

(a)

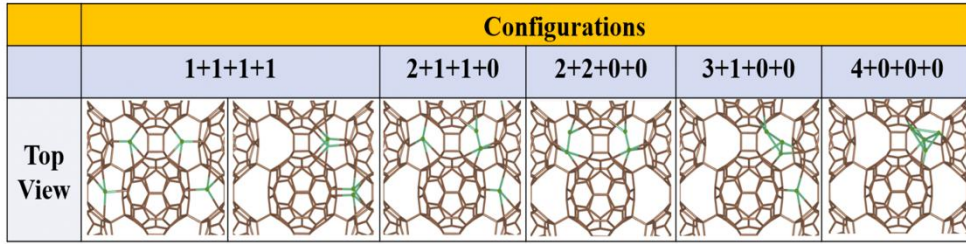

(b)

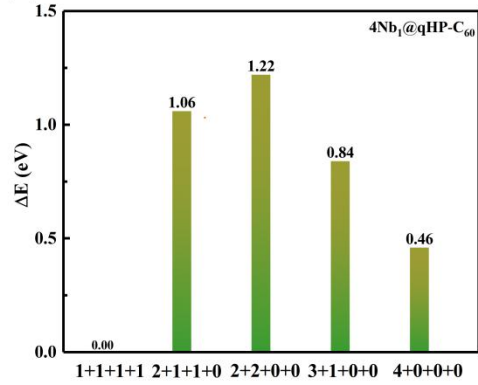

(c)

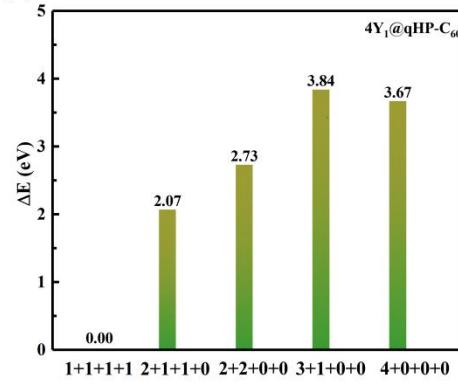

Fig. S2 (a) Optimized configurations of four transition metal atoms on the 2D qHP-C<sub>60</sub> surface; Relative energies of various configurations formed by the deposition of four Nb (b) and four Y (c) atoms on the 2D qHP-C<sub>60</sub> surface.

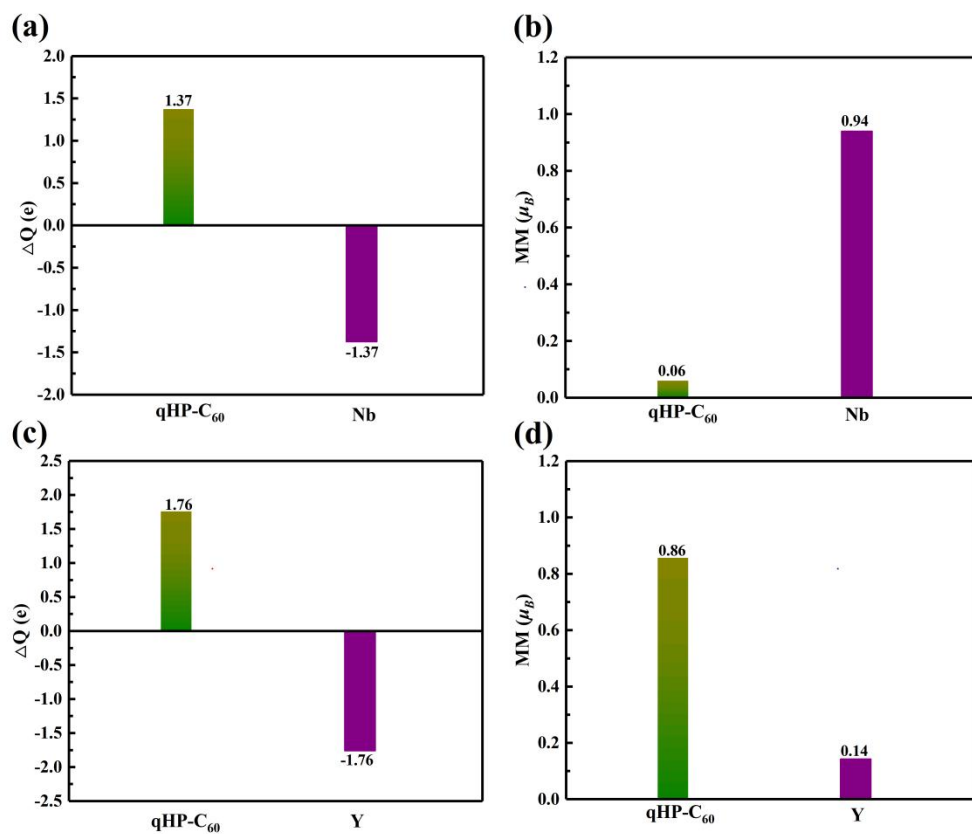

Fig. S3 Charge transfer and magnetic moment variations induced by the deposition of a single Nb or Y atom onto the 2D qHP-C<sub>60</sub> surface: (a) charge transfer and (b) magnetic moment of Nb system; While (c) and (d) represent those of Y.

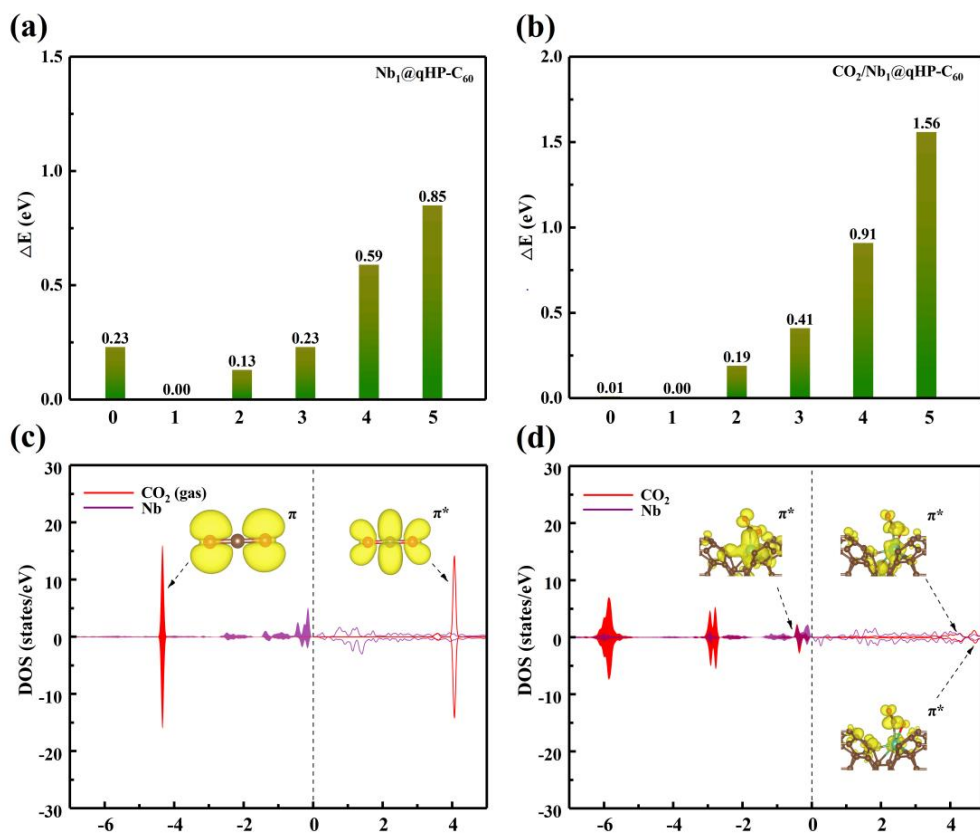

Fig. S4 (a) Relative energies of the Nb<sub>1</sub>@qHP-C<sub>60</sub> system and (b) the CO<sub>2</sub>/Nb<sub>1</sub>@qHP-C<sub>60</sub> system under varying magnetic moments; Orbital charge density distributions before (c) and after (d) CO<sub>2</sub> adsorption.

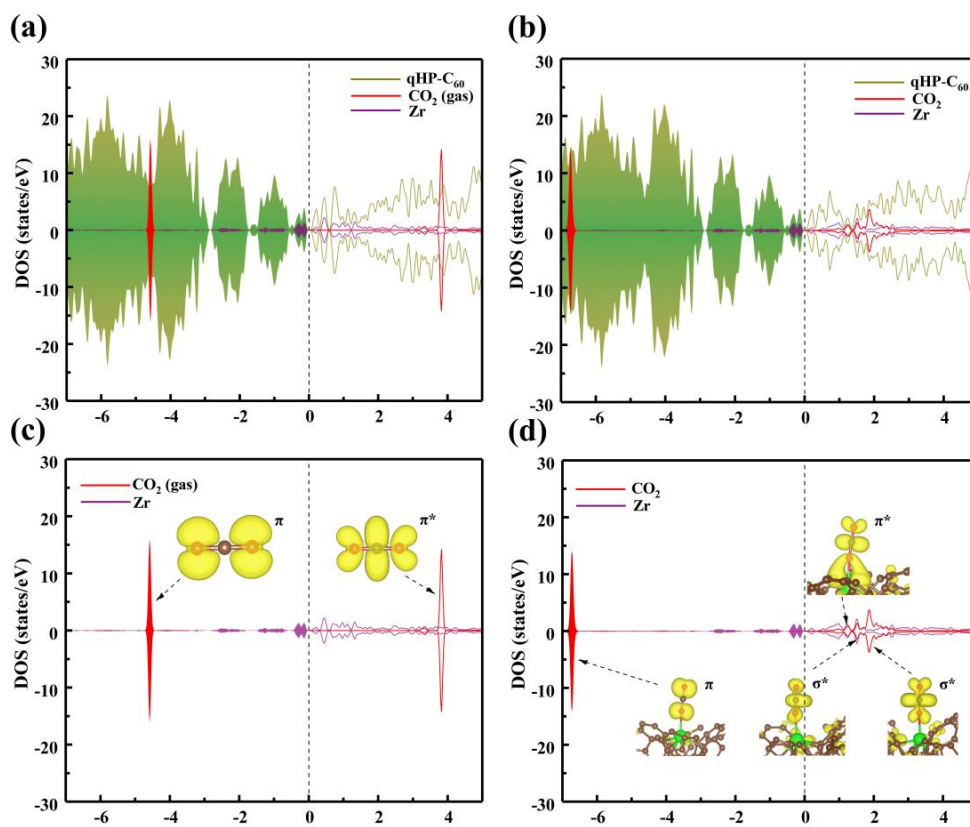

Fig. S5 In the  $Zr_1@qHP-C_{60}$  system, the electronic density of states of the  $CO_2$  molecule before (a) and after (b) adsorption, as well as the orbital charge density distributions before (c) and after (d) adsorption.

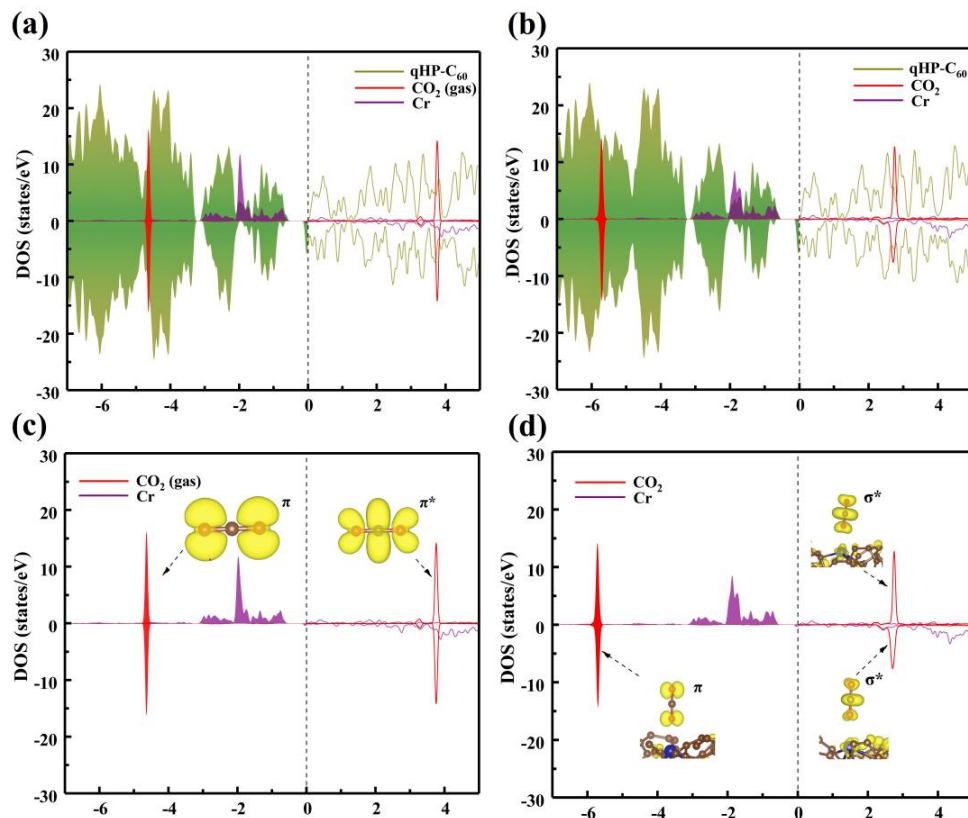

Fig. S6 In the  $\text{Cr}_1@q\text{HP-C}_{60}$  system, the electronic density of states of the  $\text{CO}_2$  molecule before (a) and after (b) adsorption, as well as the orbital charge density distributions before (c) and after (d) adsorption.

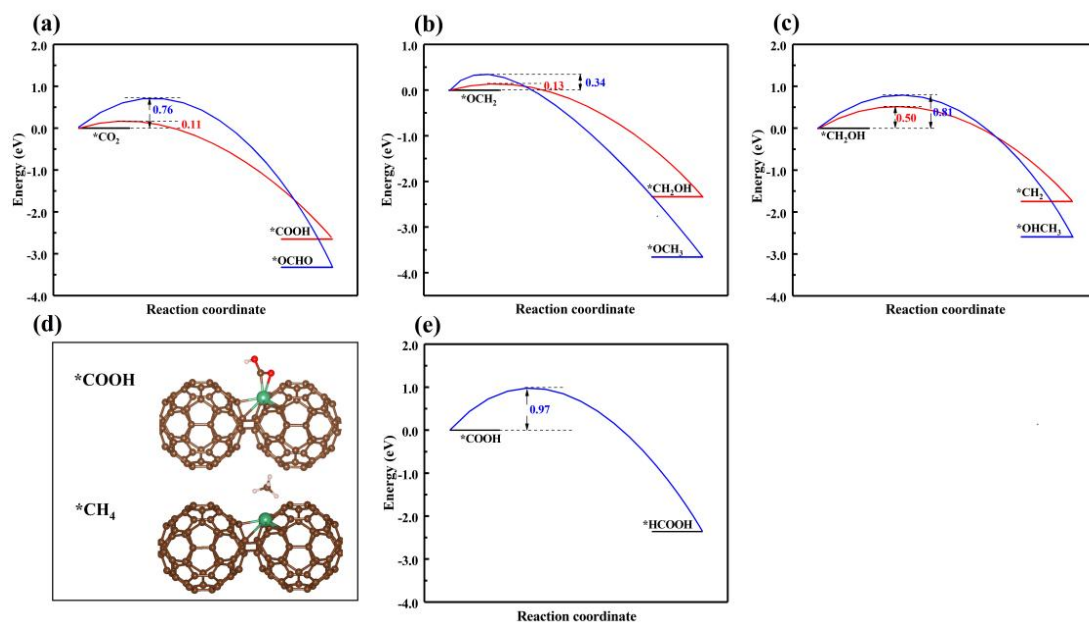

Fig. S7 The protonation barriers of (a)  $^*CO_2$ , (b)  $^*OCH_2$ , (c)  $^*CH_2OH$ , (e)  $^*COOH$ ; (d) The configurations of  $^*COOH$  and  $^*CH_4$ .

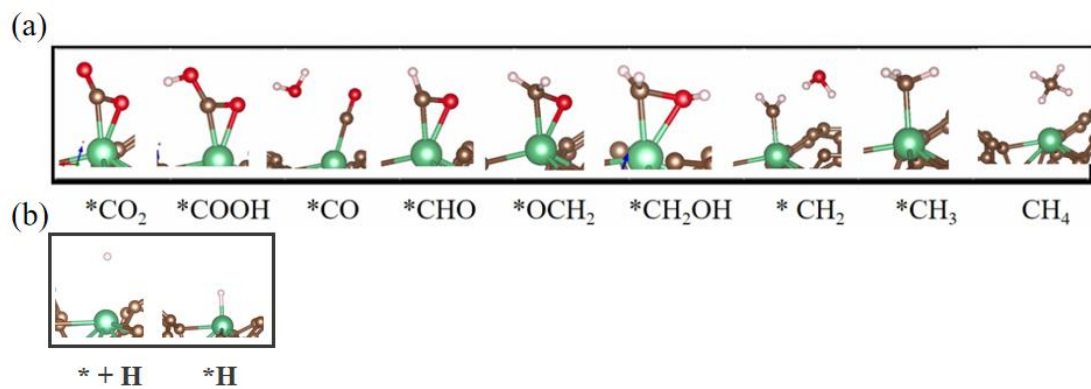

**Fig. S8:** Optimized geometries of all critical intermediates along the most favorable reaction route for (a) CO<sub>2</sub>RR and (b) HER on Nb<sub>1</sub>@qHP-C<sub>60</sub>.

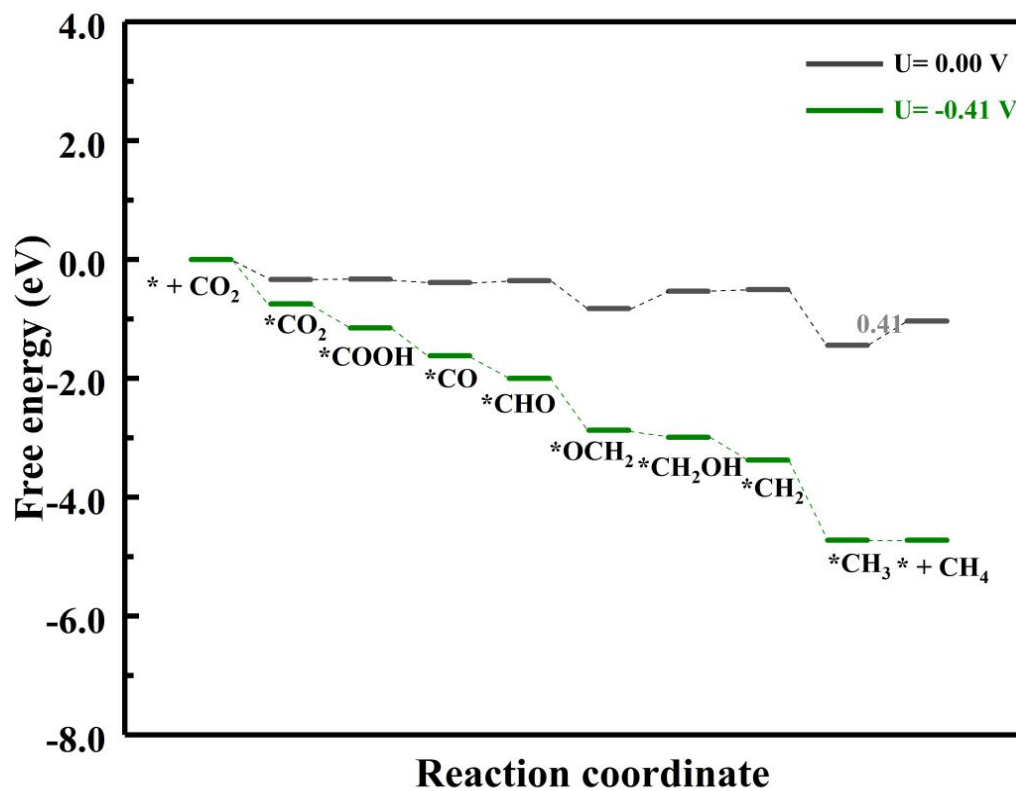

Fig. S9 The Gibbs free energy of the optimal reaction pathway for CO<sub>2</sub>RR on the Nb<sub>1</sub>@qHP-C<sub>60</sub> system at potentials of 0 V and -0.41 V.

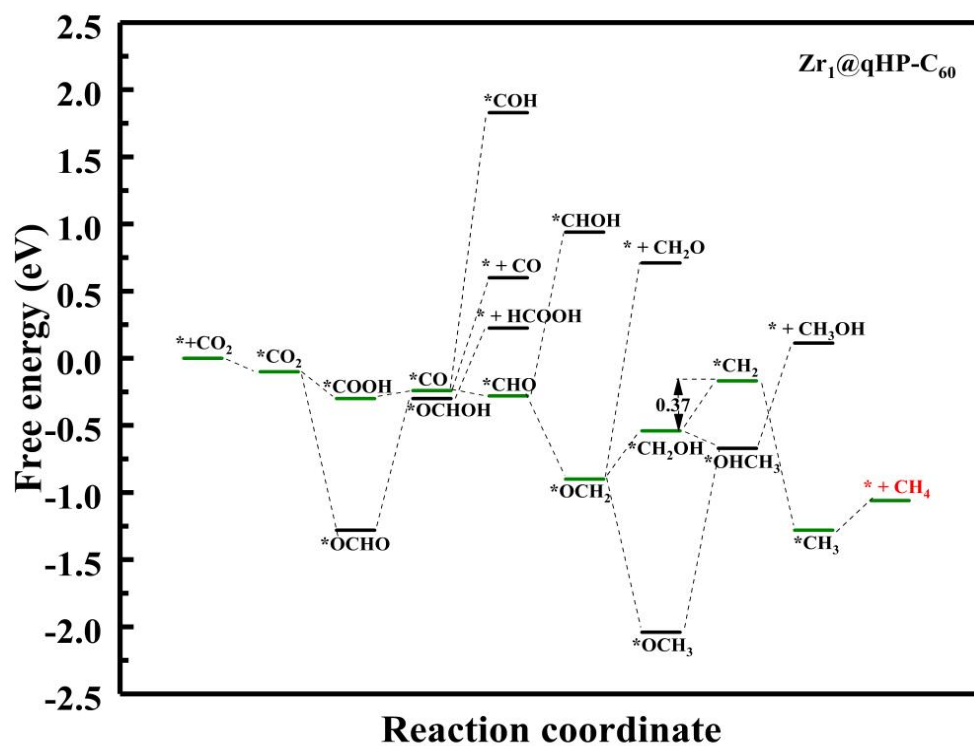

Fig. S10 The lowest energy pathways for CO<sub>2</sub>RR to various products on the Zr<sub>1</sub>@qHP-C<sub>60</sub> system (in the absence of an applied potential).

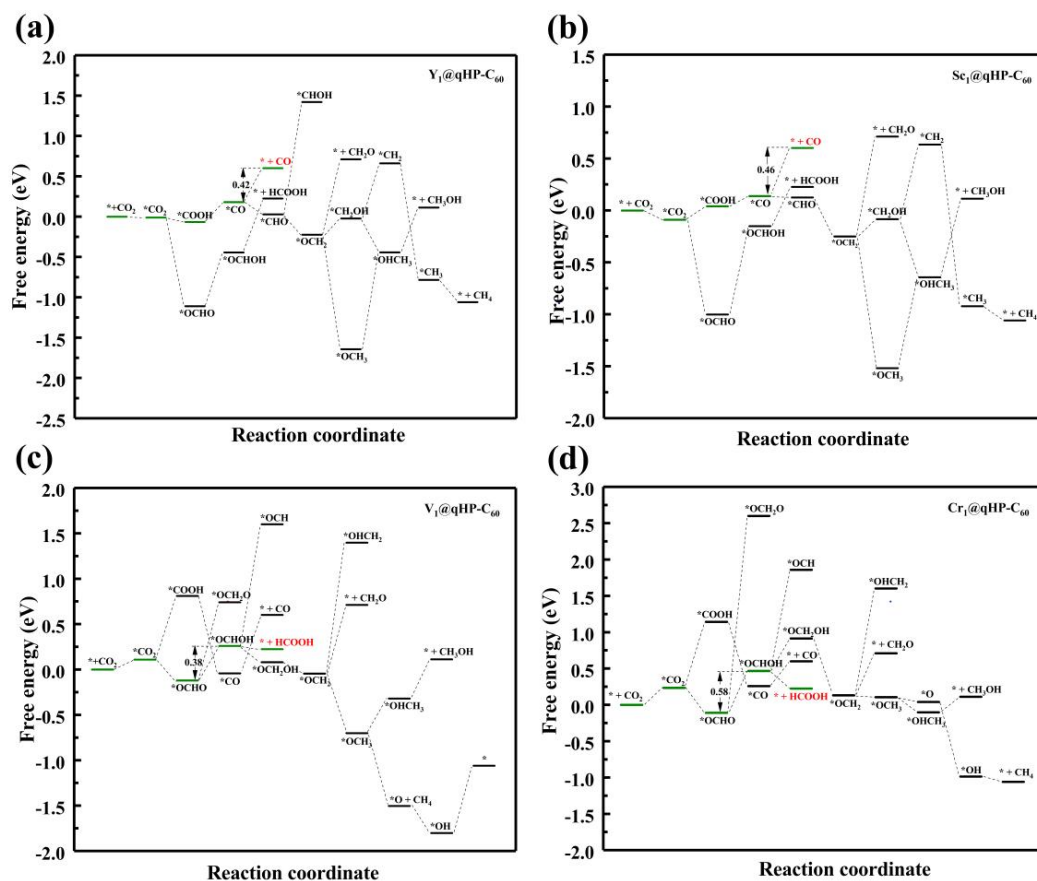

Fig. S11 The lowest energy pathways for  $CO_2RR$  to various products on the  $TM_1@qHP-C_{60}$  systems ( $TM = Y, Sc, V, Cr$ ) in the absence of an applied potential are as follows: (a)  $Y_1@qHP-C_{60}$ ; (b)  $Sc_1@qHP-C_{60}$ ; (c)  $V_1@qHP-C_{60}$ ; (d)  $Cr_1@qHP-C_{60}$ .

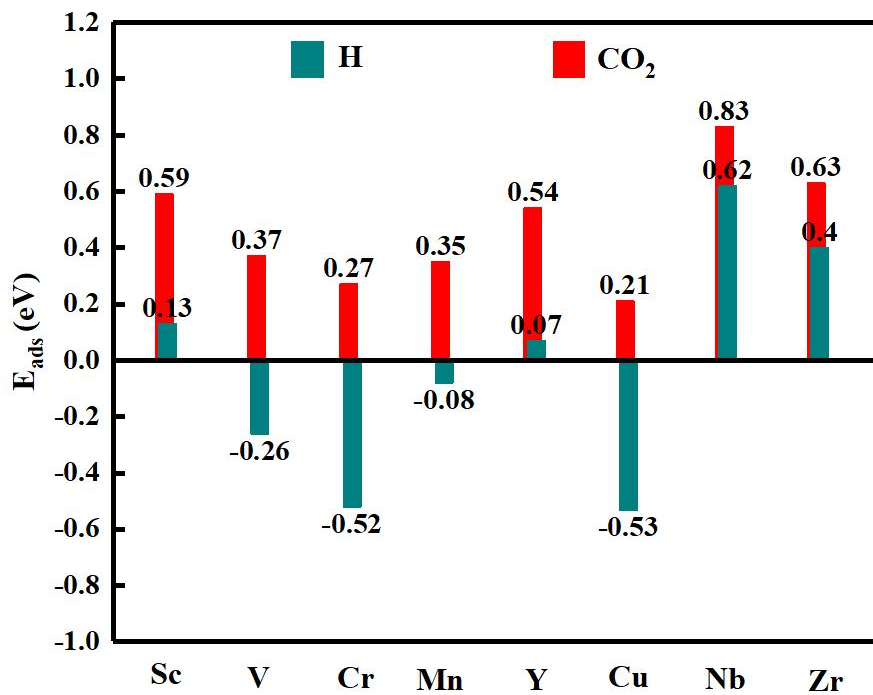

Fig. S12 Calculated adsorption energy ( $E_{\text{ads}}$ ) for both H and CO<sub>2</sub> on TM<sub>1</sub>@qHP-C<sub>60</sub> (TM = Sc, V, Cr, Mn, Y, Cu, Nb, and Zr).

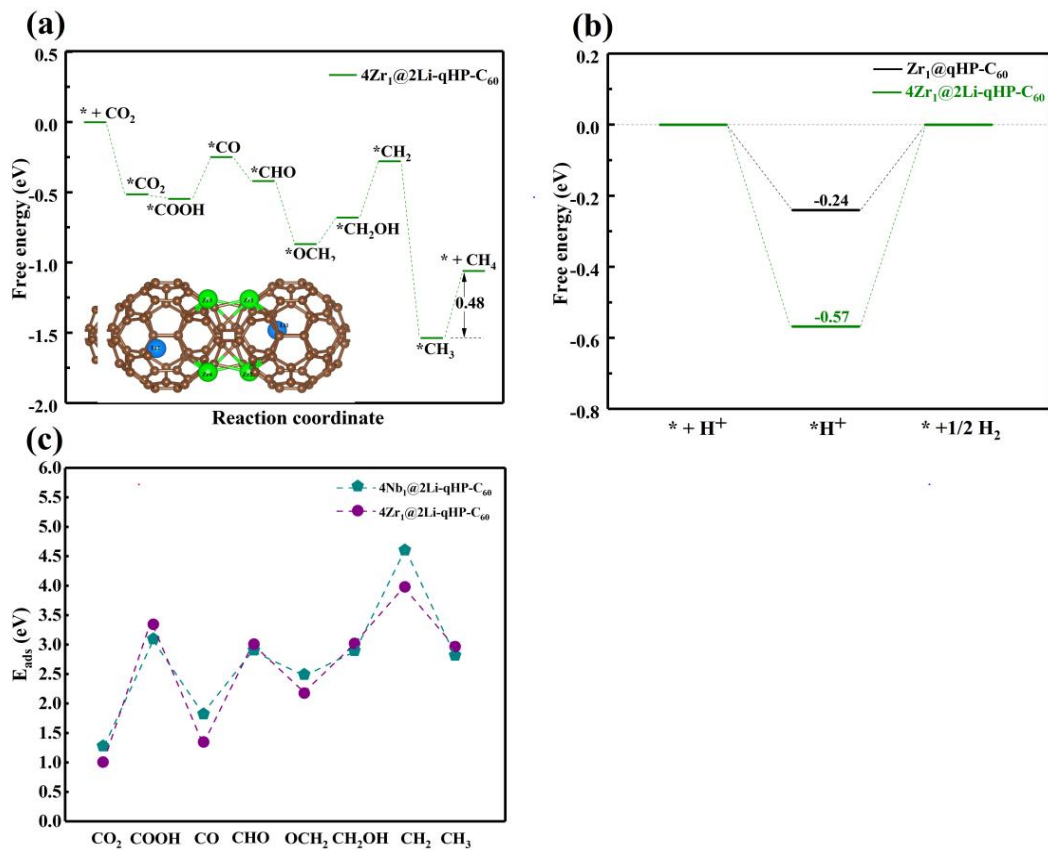

Fig. S13 (a) Gibbs free energy of the  $\text{CH}_4$  formation pathway on the  $4\text{Zr}_1@2\text{Li-qHP-C}_{60}$  system; (b) Gibbs free energy of HER for  $\text{Zr}_1@q\text{HP-C}_{60}$  and  $4\text{Zr}_1@2\text{Li-qHP-C}_{60}$  systems; (c) Adsorption energies of intermediates in the  $\text{CH}_4$  pathway on  $4\text{Nb}_1@2\text{Li-qHP-C}_{60}$  and  $4\text{Zr}_1@2\text{Li-qHP-C}_{60}$  systems.

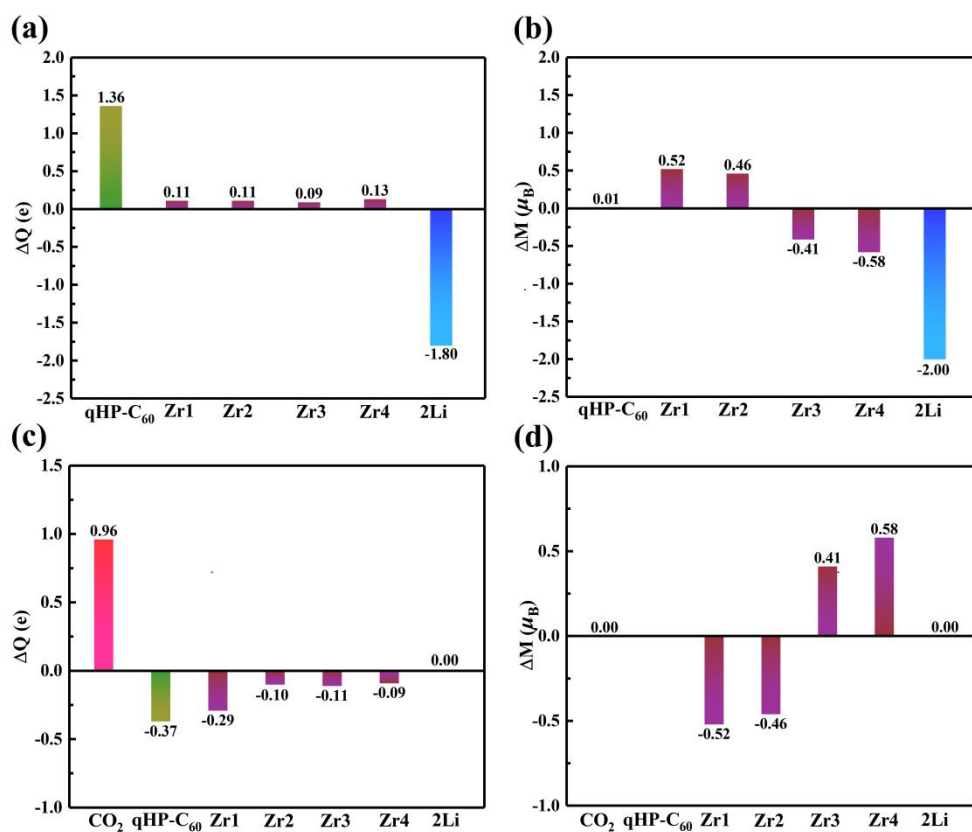

Fig. S14 Charge (a) and magnetic moment (b) variations of each component upon embedding two Li atoms into the 4Zr<sub>1</sub>@qHP-C<sub>60</sub> system; Charge (c) and magnetic moment (d) variations of each component during CO<sub>2</sub> adsorption on the 4Zr<sub>1</sub>@2Li-qHP-C<sub>60</sub> system.

**Table S1** The structural parameters of CO<sub>2</sub> after adsorption on TM<sub>1</sub>@qHP-C<sub>60</sub> (TM = Nb, Zr, Cr) include the O-C-O bond angle, the C-O bond length, the TM-CO<sub>2</sub> distance, and the corresponding charge transfer.

|                                      | $\angle \text{O-C-O} (^{\circ})$ | O <sub>1</sub> -C (Å) | O <sub>2</sub> -C (Å) | (C)O <sub>2</sub> -TM (Å) | $\Delta Q$ (e) |
|--------------------------------------|----------------------------------|-----------------------|-----------------------|---------------------------|----------------|
| CO <sub>2</sub> (gas)                | 180.00                           | 1.18                  | 1.18                  | /                         |                |
| Nb <sub>1</sub> @qHP-C <sub>60</sub> | 135.08                           | 1.22                  | 1.33                  | (2.13) 2.10               | 0.76           |
| Zr <sub>1</sub> @qHP-C <sub>60</sub> | 179.43                           | 1.17                  | 1.19                  | 2.40                      | -0.01          |
| Cr <sub>1</sub> @qHP-C <sub>60</sub> | 179.81                           | 1.18                  | 1.18                  | 2.53                      | 0.02           |

**Table S2** Calculated spin moment variation contributed from qHP-C<sub>60</sub> substrate ( $\Delta M_{\text{qHP-C60}}$ ) and TM single atom ( $\Delta M_{\text{TM}}$ ) and CO<sub>2</sub> species ( $\Delta M_{\text{CO2}}$ ) upon CO<sub>2</sub> adsorption. The adsorption energies ( $E_{\text{ads}}$ ) are also provided.

| TM <sub>1</sub> /qHP-C <sub>60</sub> | $\Delta M_{\text{TM}}$ ( $\mu_{\text{B}}$ ) | $\Delta M_{\text{CO2}}$ ( $\mu_{\text{B}}$ ) | $\Delta M_{\text{qHP-C60}}$ ( $\mu_{\text{B}}$ ) | $E_{\text{ads}}(\text{CO}_2)(\text{eV})$ |
|--------------------------------------|---------------------------------------------|----------------------------------------------|--------------------------------------------------|------------------------------------------|
| Nb                                   | -0.52                                       | 0                                            | +0.52                                            | 0.83                                     |
| Zr                                   | -0.08                                       | -0.01                                        | 0.09                                             | 0.63                                     |
| Sc                                   | -0.06                                       | 0                                            | -0.06                                            | 0.59                                     |
| Y                                    | -0.02                                       | 0                                            | 0.02                                             | 0.54                                     |
| V                                    | -0.05                                       | 0.06                                         | -0.01                                            | 0.37                                     |
| Cr                                   | -0.05                                       | 0.05                                         | 0.00                                             | 0.27                                     |

**Table S3** Comparison of CO<sub>2</sub>RR performance between our optimal single-atom catalysts (SACs) and representative SACs reported in previous literature.

| catalytic system                                    | product         | $\Delta G$ (eV) | source                                                     |
|-----------------------------------------------------|-----------------|-----------------|------------------------------------------------------------|
| Fe-TCSAC                                            | CO              | 0.57            | <i>J. Am. Chem. Soc.</i> <b>2025</b> , 147, 20318-20328    |
| CuZn-SAs/NC                                         | CH <sub>4</sub> | 0.76            | <i>Chem. Eng. J.</i> <b>2023</b> , 471, 144618             |
| Zr-MOF-In                                           | HCOOH           | 0.49            | <i>Angew. Chem. Int. Ed.</i> <b>2025</b> , 137, e202511132 |
| Ag <sub>1</sub> @NCNT<br>Ag <sub>1</sub> -AgAC@NCNT | CO              | 1               | <i>Adv. Energy Mater.</i> <b>2024</b> , 14, 2400143        |
| Ni <sub>3</sub> -N-C                                | CO              | 0.45            | <i>Angew. Chem. Int. Ed.</i> <b>2026</b> , 65, e18107      |
